# Supplementary material for: New World Health Organization recommendations for care of preterm or low birth weight infants: health policy
Source: PubMed Central journal article supplement — eClinicalMedicine. 2023 Aug 16;63:102155. doi: 10.1016/j.eclinm.2023.102155 (PMC10518507; doi:10.1016/j.eclinm.2023.102155), 2023-08-16
Supplement: mmc1.pdf [file mmc1.pdf]

**SUPPLEMENTARY MATERIAL**

**New World Health Organization recommendations for care of preterm or low birth weight infants: health policy**

**Running title: Care for preterm or low birth weight infants**

**Care of Preterm or Low Birthweight Infants Group**

**V24July2023 eClinicalMedicine**

**Table S1. Interventions and systematic review research questions for care of preterm or LBW infants**

| <b>Interventions</b> |                                     | <b>Research questions/PICO</b>                                                                                                                                                                                                                                                                                                                                  |
|----------------------|-------------------------------------|-----------------------------------------------------------------------------------------------------------------------------------------------------------------------------------------------------------------------------------------------------------------------------------------------------------------------------------------------------------------|
| Kangaroo Mother Care | Kangaroo mother care (KMC)          | In preterm or LBW infants (P), what is the effect of KMC (I) compared to conventional neonatal care (C) on critical outcomes (O)? If KMC is effective then what is the effect of early-onset KMC (I) compared to late-onset KMC (C) on critical outcomes (O)? What is the effect of short (I) compared to longer (C) durations of KMC on critical outcomes (O)? |
| Feeding              | Mother's own milk                   | In preterm or LBW infants (P), what is the effect of feeding mother's own milk (I) compared with feeding infant formula (C) on critical outcomes (O)?                                                                                                                                                                                                           |
|                      | Donor human milk                    | In preterm or LBW infants who cannot be fed mother's own milk (P), what is the effect of feeding donor human milk (I) compared with feeding infant formula (C) on critical outcomes (O)?                                                                                                                                                                        |
|                      | Infant formula                      | In preterm or LBW infants who cannot be fed mother's own milk or donor human milk (P), what is the effect of feeding nutrient enriched ('preterm') infant formula (I) compared with feeding standard infant ('term') formula (C) on critical outcomes (O)?                                                                                                      |
|                      | Fortification                       | In preterm or LBW infants who are fed mother's own milk or donor human milk (P), what is the effect of multi-component fortification of milk (I) compared with no fortification (C) on critical outcomes (O)?                                                                                                                                                   |
|                      | Initiation of enteral feeding       | In preterm or LBW infants (P) what is the effect of early initiation of enteral feeding (I) compared to delayed feeding (C) on critical outcomes (O)? If early then when should feeding be initiated? Does this effect differ in infants given full enteral feeding compared to infants given restricted volumes including minimal enteral feeding?             |
|                      | Responsive feeding                  | In preterm or LBW infants who receive any enteral feeding (P), what is the effect of responsive feeding based on infants' cues (I) compared with scheduled feeding (C) on critical outcomes (O)?                                                                                                                                                                |
|                      | Volume advancement                  | In preterm or LBW infants who receive any enteral feeding (P), what is the effect of fast advancement of enteral feeds (I) versus slower rates of feed advancement (C) on critical outcomes (O)?                                                                                                                                                                |
|                      | Duration of exclusive breastfeeding | In preterm or LBW infants (P), what is the effect of exclusive breastfeeding for less than 6 months (I) compared with exclusive breastfeeding for 6 months (C) on critical outcomes (O)? If less than 6 months, then what is the optimal duration?                                                                                                              |

|                               |                                    |                                                                                                                                                                                                                                                                                                                                                                                            |
|-------------------------------|------------------------------------|--------------------------------------------------------------------------------------------------------------------------------------------------------------------------------------------------------------------------------------------------------------------------------------------------------------------------------------------------------------------------------------------|
| Micronutrients                | Iron                               | In preterm or LBW infants who are fed mother's own milk or donor human milk (P), what is the effect of enteral iron supplementation (I) compared with no iron supplementation (C) on critical outcomes (O)?                                                                                                                                                                                |
|                               | Zinc                               | In preterm or LBW infants who are fed mother's own milk or donor human milk (P), what is the effect of enteral zinc supplementation (I) compared with no zinc supplementation (C) on critical outcomes (O)?                                                                                                                                                                                |
|                               | Vitamin D                          | In preterm or LBW infants who are fed mother's own milk or donor human milk (P), what is the effect of enteral vitamin D supplementation (I) compared with no vitamin D supplementation (C) on critical outcomes (O)?                                                                                                                                                                      |
|                               | Vitamin A                          | In preterm or LBW infants who are fed mother's own milk or donor human milk (P), what is the effect of enteral vitamin A supplementation (I) compared with no vitamin A supplementation (C) on critical outcomes (O)?                                                                                                                                                                      |
|                               | Calcium and phosphorous            | In preterm or LBW infants who are fed mother's own milk or donor human milk (P), what is the effect of enteral CaP04 supplementation (I) compared with no CaP04 supplementation (C) on critical outcomes (O)?                                                                                                                                                                              |
|                               | Multiple micronutrient supplements | In preterm or LBW infants who are fed mother's own milk or donor human milk (P), what is the effect of enteral multiple micronutrient supplements (I) compared with no enteral multiple micronutrient supplements (C) on critical outcomes (O)?                                                                                                                                            |
| Probiotics                    | Probiotics                         | In preterm or LBW infants who are fed mother's own milk or donor human milk (P),, what is the effect of probiotics (I) versus no probiotics (C) on critical outcomes (O)?                                                                                                                                                                                                                  |
| Skin care                     | Emollients                         | In preterm or LBW infants (P) what is the effect of topical ointment, cream or oil applied to the skin (I) compared to routine skin care (C) on critical outcomes (O)?                                                                                                                                                                                                                     |
| Respiratory Distress Syndrome | CPAP for respiratory distress      | In preterm infants with respiratory distress syndrome (P), what is the effect of any CPAP therapy (I) versus supportive care with oxygen therapy by head box, facemask or nasal cannula (C) on critical outcomes (O)?                                                                                                                                                                      |
|                               | Early CPAP                         | In preterm infants with respiratory distress syndrome (P), what is the effect of early CPAP (I) versus late CPAP(C) on critical outcomes (O)?                                                                                                                                                                                                                                              |
|                               | CPAP prophylaxis                   | In preterm infants less than 32w regardless of respiratory status (P) What is the effect of CPAP started immediately after birth (I) compared to supportive care with oxygen therapy by head box, facemask or nasal cannula (C) on critical outcomes (O)? -what is the effect of CPAP started immediately after birth (I) compared to mechanical ventilation (C) on critical outcomes (O)? |

|                                |                      |                                                                                                                                                                                                                                                                                   |
|--------------------------------|----------------------|-----------------------------------------------------------------------------------------------------------------------------------------------------------------------------------------------------------------------------------------------------------------------------------|
|                                | CPAP pressure source | In preterm infants with respiratory distress syndrome, what is the effect of bubble (I) compared to other forms of CPAP (C) on critical outcomes (O)?                                                                                                                             |
| Apnoea                         | Methyl xanthines     | In preterm infants, what is the effect of any methyl xanthine compared with no methyl xanthine on critical outcomes? What is the effect by indication (any, prevention, treatment), by type of methyl xanthine (eg caffeine, theophylline) and by gestational age or birthweight. |
| Family involvement and support | Family involvement   | In hospitalised preterm or LBW infants (P) do interventions to involve families in the infant's routine health care (family involvement strategies, FIS) (I) compared to standard hospital or NICU care (C) improve critical outcomes (O)                                         |
|                                | Family support       | In preterm or LBW infants (P), do interventions to support the family to care for the infant in the home (I) compared to no or different interventions (C) improve critical outcomes (O)                                                                                          |

PICO = population, intervention, comparator, outcome questions

**Table S2. Evidence base**

|                                |                                                                                                                                                                                                                                                          |
|--------------------------------|----------------------------------------------------------------------------------------------------------------------------------------------------------------------------------------------------------------------------------------------------------|
| <b>Framework</b>               |                                                                                                                                                                                                                                                          |
| Overview of systematic reviews | Edmond K, Strobel N. Evidence for Global Health Care Interventions for Preterm or Low Birth Weight Infants: An Overview of Systematic Reviews. <i>Pediatrics</i> . 2022 Aug 1;150(Suppl 1):e2022057092C. doi: 10.1542/peds.2022-057092C.                 |
| Values and acceptability       | Hurt L, Odd D, Mann M, Beetham H, Dorgeat E, Isaac TC, et al. What matters to families about the healthcare of preterm or low birth weight babies: a qualitative evidence synthesis. medRxiv. 2022:2022.06.22.22276770. doi:10.1101/2022.06.22.22276770. |
| Supplies                       | UNICEF supply catalogue [website]. New York (NY): United Nations Children’s Fund; 2018 ( <a href="https://supply.unicef.org/">https://supply.unicef.org/</a> )                                                                                           |
| Medical products               | International medical products price guide, 2015 edition. Medford (MA): Management Sciences for Health; 2016 ( <a href="https://mshpriceguide.org/en/home">https://mshpriceguide.org/en/home</a> )                                                       |
| Health technologies            | WHO compendium of innovative health technologies for low-resource settings: 2022. Geneva: World Health Organization; 2022 ( <a href="https://apps.who.int/iris/handle/10665/355162">https://apps.who.int/iris/handle/10665/355162</a> )                  |
| <b>WHO guidelines</b>          |                                                                                                                                                                                                                                                          |
| WHO guidelines                 | WHO recommendations for care of the preterm or low birth weight infant. Geneva: World Health Organization; 2022. Licence: CC BY-NC-SA 3.0 IGO                                                                                                            |
| WHO annexes                    | Web Annexes. In: WHO recommendations for care of the preterm or low-birth-weight infant. Geneva: World Health Organization; 2022. Licence: CC BY-NC-SA 3.0 IGO                                                                                           |
| WHO GRADE tables               | Web Supplement. Evidence base. In: WHO recommendations for care of the preterm or low-birth-weight infant. Geneva: World Health Organization; 2022. Licence: CC BY-NC-SA 3.0 IGO                                                                         |
| <b>Individual reviews</b>      |                                                                                                                                                                                                                                                          |
| Kangaroo mother care           | Sivanandan S, Sankar MJ. Kangaroo mother care for preterm or low birth weight infants: A systematic review and meta-analysis. medRxiv. 2022:2022.09.14.22279053. doi:10.1101/2022.09.14.22279053. In Press BMJ Global health                             |
| Mother's own milk              | Strobel NA, Adams C, McAullay DR, Edmond KM. Mother's Own Milk Compared With Formula Milk for Feeding Preterm or Low Birth Weight Infants: Systematic Review and Meta-analysis. <i>Pediatrics</i> 2022; 150(Suppl 1). doi:10.1542/peds.2022-057092D.     |
| Donor human milk               | Quigley M, Embleton ND, McGuire W. Formula versus donor breast milk for feeding preterm or low birth weight infants. <i>Cochrane Database Syst Rev</i> 2019; 7(7): CD002971. doi:10.1002/14651858.CD002971.pub5.                                         |

|                                         |                                                                                                                                                                                                                                                                                                                |
|-----------------------------------------|----------------------------------------------------------------------------------------------------------------------------------------------------------------------------------------------------------------------------------------------------------------------------------------------------------------|
| Multicomponent fortifier                | Brown JV, Lin L, Embleton ND, Harding JE, McGuire W. Multi-nutrient fortification of human milk for preterm infants. <i>Cochrane Database Syst Rev</i> 2020; 6(7): CD000343. doi:10.1002/14651858.CD000343.pub4.                                                                                               |
| Preterm formula                         | Walsh V, Brown JVE, Askie LM, Embleton ND, McGuire W. Nutrient-enriched formula versus standard formula for preterm infants. <i>Cochrane Database Syst Rev</i> 2019; 7(7): CD004204. doi:10.1002/14651858.CD004204.pub3.                                                                                       |
| Early initiation of enteral feeding     | Chitale R, Ferguson K, Talej M, Yang WC, He S, Edmond KM, et al. Early Enteral Feeding for Preterm or Low Birth Weight Infants: a Systematic Review and Meta-analysis. <i>Pediatrics</i> 2022; 150(Suppl 1). doi:10.1542/peds.2022-057092E.                                                                    |
| Responsive and scheduled feeding        | Talej M, Smith ER, Lauria ME, Chitale R, Ferguson K, He S. Responsive Feeding for Preterm or Low Birth Weight Infants: A Systematic Review and Meta-analysis. <i>Pediatrics</i> 2022; 150(Suppl 1). doi:10.1542/peds.2022-057092F.                                                                             |
| Advancement of feeding                  | Yang WC, Fogel A, Lauria ME, Ferguson K, Smith ER. Fast Feed Advancement for Preterm and Low Birth Weight Infants: A Systematic Review and Meta-analysis. <i>Pediatrics</i> 2022; 150(Suppl 1). doi:10.1542/peds.2022-057092G.                                                                                 |
| Duration of exclusive breastfeeding     | Yang WC, Lauria ME, Fogel A, Ferguson K, Smith ER. Duration of Exclusive Breastfeeding for Preterm or Low Birth Weight Infants: A Systematic Review and Meta-analysis. <i>Pediatrics</i> 2022; 150(Suppl 1). doi:10.1542/peds.2022-057092H.                                                                    |
| Iron supplementation                    | Manapurath RM, Gadapani Pathak B, Sinha B, Upadhyay RP, Choudhary TS, Chandola TR, et al. Enteral Iron Supplementation in Preterm or Low Birth Weight Infants: A Systematic Review and Meta-analysis. <i>Pediatrics</i> 2022; 150(Suppl 1). doi:10.1542/peds.2022-057092I.                                     |
| Zinc supplementation                    | Sinha B, Dudeja N, Chowdhury R, Choudhary TS, Upadhyay RP, Rongsen-Chandola T, et al. Enteral Zinc Supplementation in Preterm or Low Birth Weight Infants: A Systematic Review and Meta-analysis. <i>Pediatrics</i> 2022; 150(Suppl 1). doi:10.1542/peds.2022-057092J.                                         |
| Vitamin D supplementation               | Kumar M, Shaikh S, Sinha B, Upadhyay RP, Choudhary TS, Chandola TR, et al. Enteral Vitamin D Supplementation in Preterm or Low Birth Weight Infants: A Systematic Review and Meta-analysis. <i>Pediatrics</i> 2022; 150(Suppl 1). doi:10.1542/peds.2022-057092K.                                               |
| Vitamin A supplementation               | Manapurath RM, Kumar M, Pathak BG, Chowdhury R, Sinha B, Choudhary T, et al. Enteral Low-Dose Vitamin A Supplementation in Preterm or Low Birth Weight Infants to Prevent Morbidity and Mortality: a Systematic Review and Meta-analysis. <i>Pediatrics</i> 2022; 150(Suppl 1). doi:10.1542/peds.2022-057092L. |
| Calcium and phosphorous supplementation | Kumar M, Chowdhury R, Sinha B, Upadhyay RP, Chandola TR, Mazumder S, et al. Enteral Calcium or Phosphorus Supplementation in Preterm or Low Birth Weight Infants: a Systematic Review and Meta-analysis. <i>Pediatrics</i> 2022; 150(Suppl 1). doi:10.1542/peds.2022-057092M.                                  |

|                                        |                                                                                                                                                                                                                                                                                                                                                                                                                             |
|----------------------------------------|-----------------------------------------------------------------------------------------------------------------------------------------------------------------------------------------------------------------------------------------------------------------------------------------------------------------------------------------------------------------------------------------------------------------------------|
| Multiple micronutrient supplementation | Kumar M, Chowdhury R, Sinha B, Upadhyay RP, Chandola TR, Mazumder S, et al. Enteral Multiple Micronutrient Supplementation in Preterm and Low Birth Weight Infants: A Systematic Review and Meta-analysis. <i>Pediatrics</i> 2022; 150(Suppl 1). doi:10.1542/peds.2022-057092N.                                                                                                                                             |
| Probiotics                             | Sharif S, Meader N, Oddie SJ, Rojas-Reyes MX, McGuire W. Probiotics to prevent necrotising enterocolitis in very preterm or very low birth weight infants. <i>Cochrane Database Syst Rev</i> 2020; 10(10): CD005496. doi:10.1002/14651858.CD005496.pub5.                                                                                                                                                                    |
| Emollients                             | Cleminson J, McGuire W. Topical emollient for preventing infection in preterm infants. <i>Cochrane Database Syst Rev</i> 2021; 5(5): CD001150. doi:10.1002/14651858.CD001150.pub4.                                                                                                                                                                                                                                          |
| CPAP for respiratory distress          | Ho JJ, Subramaniam P, Davis PG. Continuous positive airway pressure (CPAP) for respiratory distress in preterm infants. <i>Cochrane Database Syst Rev</i> 2020; 10(10): CD002271. doi:10.1002/14651858.CD002271.pub3.                                                                                                                                                                                                       |
| Early CPAP                             | Ho JJ, Subramaniam P, Sivakaanthan A, Davis PG. Early versus delayed continuous positive airway pressure (CPAP) for respiratory distress in preterm infants. <i>Cochrane Database Syst Rev</i> 2020; 10(10): CD002975. doi:10.1002/14651858.CD002975.pub2.                                                                                                                                                                  |
| Prophylactic CPAP                      | Subramaniam P, Ho JJ, Davis PG. Prophylactic or very early initiation of continuous positive airway pressure (CPAP) for preterm infants. <i>Cochrane Database Syst Rev</i> 2021; 10(10): CD001243. doi:10.1002/14651858.CD001243.pub4.                                                                                                                                                                                      |
| Bubble CPAP                            | Prakash R, De Paoli AG, Davis PG, Oddie SJ, McGuire W. Bubble devices versus other pressure sources for nasal continuous positive airway pressure in preterm infants. <i>Cochrane Database Syst Rev</i> . 2023 Mar 31;3(3):CD015130. doi: 10.1002/14651858.CD015130.                                                                                                                                                        |
| Methyl xanthines                       | Marques K, Roehr CC, Bruschetti M, Davis PG, Soll R. Methylxanthine for the prevention and treatment of apnea in preterm infants. <i>Cochrane Database Syst Rev</i> 2022; (In Press).                                                                                                                                                                                                                                       |
| Family involvement                     | North K, Whelan R, Folger LV, Lawford H, Olson I, Driker S, et al. Family Involvement in the Routine Care of Hospitalized Preterm or Low Birth Weight Infants: A Systematic Review and Meta-analysis. <i>Pediatrics</i> 2022; 150(Suppl 1). doi:10.1542/peds.2022-057092O.                                                                                                                                                  |
| Family support                         | Bedwell C, Lavender T, Tate N, Danna VA. Interventions to support parents, families and carers in caring for premature or low birth weight (LBW) infants in the home: a systematic review and meta-analysis. <i>medRxiv</i> . 2022:2022. doi:10.1101/2022.10.25.22281452. <a href="https://medrxiv.org/cgi/content/short/2022.10.25.22281452v1">https://medrxiv.org/cgi/content/short/2022.10.25.22281452v1</a> . Submitted |
| Home visits                            | Bedwell C, Lavender T, Tate N, Danna VA. Interventions to support parents, families and carers in caring for premature or low birth weight (LBW) infants in the home: a systematic review and meta-analysis. <i>medRxiv</i> . 2022:2022. doi:10.1101/2022.10.25.22281452. <a href="https://medrxiv.org/cgi/content/short/2022.10.25.22281452v1">https://medrxiv.org/cgi/content/short/2022.10.25.22281452v1</a> . Submitted |

**Table S3. Evidence to decision framework and methods**

| <b>Domain</b>         | <b>Questions to be answered</b>                                                                                                                             | <b>Methods</b>                                                                                                        | <b>Rating</b>                                                                                                                      |
|-----------------------|-------------------------------------------------------------------------------------------------------------------------------------------------------------|-----------------------------------------------------------------------------------------------------------------------|------------------------------------------------------------------------------------------------------------------------------------|
| Benefits              | How effective is the intervention?                                                                                                                          | Quantitative systematic reviews of effectiveness studies                                                              | Large, moderate, small, trivial, none, varies, don't know                                                                          |
| Harms                 | Are there important adverse events reported by the study from the intervention?                                                                             | Quantitative systematic reviews of effectiveness studies                                                              | Large, moderate, small, trivial, none, varies, don't know                                                                          |
| Balance of effects    | Does the balance between benefits and harms favour the intervention?                                                                                        | DECIDE <sup>a</sup> framework <sup>40</sup>                                                                           | Favours intervention, probably favours intervention, probably favours no intervention, favours no intervention, varies, don't know |
| Certainty             | What is the certainty of the effectiveness evidence?                                                                                                        | GRADE <sup>b</sup> or GRADE CerQual <sup>c</sup> assessment of the certainty of the body of evidence <sup>38,39</sup> | Bias, imprecision, inconsistency, indirectness<br><br>High, moderate, low, very low certainty                                      |
| Values about outcomes | Is there important variability in the values or preferences a family might have about the outcomes that would impact judgments about the balance of effects | Qualitative systematic reviews of experimental, quasi-experimental and observational studies                          | Yes, probably yes, probably no, no, varies, don't know                                                                             |
| Acceptability         | Is the intervention acceptable?                                                                                                                             | Qualitative systematic reviews of experimental, quasi-experimental and observational studies                          | Yes, probably yes, probably no, no, varies, don't know                                                                             |
| Resources             | What resources are required and what are their costs?                                                                                                       | Structured searches in resource, cost, feasibility and equity databases <sup>d</sup>                                  | Negligible costs, low to moderate costs, large costs, varies, don't know                                                           |
| Feasibility           | What is the feasibility of the intervention? Can it be easily or conveniently implemented? Is the intervention                                              | Structured searches in resource, cost, feasibility and equity databases <sup>d</sup>                                  | Yes, probably yes, probably no, no, varies, don't know                                                                             |



|        |                                                                                                                                                     |                                                                                       |                                                        |
|--------|-----------------------------------------------------------------------------------------------------------------------------------------------------|---------------------------------------------------------------------------------------|--------------------------------------------------------|
|        | acceptable and are the resources required achievable?                                                                                               |                                                                                       |                                                        |
| Equity | Can the intervention be provided in low resource settings? Will the populations that need the intervention most receive it quickly and at low cost? | Structured searches in resource, cost,, feasibility and equity databases <sup>d</sup> | Yes, probably yes, probably no, no, varies, don't know |

<sup>a</sup>DECIDE = The DECIDE framework (Developing and Evaluating Communication Strategies to support Informed Decisions and Practice based on Evidence<sup>40</sup>

<sup>b</sup>GRADE = Grading of Recommendations Assessment, Development and Evaluation<sup>38</sup>

<sup>c</sup>CERQual = Confidence in the Evidence from Reviews of Qualitative research<sup>39</sup>

<sup>d</sup>Searches = Structured searches in UNICEF supply catalogue,<sup>41</sup> International Medical Products Price Guide,<sup>42</sup> and the WHO compendium of innovative health technologies for low resource settings and health equity databases<sup>43</sup>

**Table S4. Evidence-to-decision framework domains**

| <b>Domain</b>                         | <b>Favors strong</b>                                                                              | <b>Favors conditional</b>                                                                           |
|---------------------------------------|---------------------------------------------------------------------------------------------------|-----------------------------------------------------------------------------------------------------|
| Balance of benefits to harms          | Benefits highly outweigh harms                                                                    | Benefits and harms more closely balanced                                                            |
| Quality of evidence                   | Higher certainty                                                                                  | Lower certainty                                                                                     |
| Values/preferences regarding outcomes | Benefits to harms assessment not impacted by variability in values/preferences regarding outcomes | Variability in values/preferences regarding outcomes that would impact benefits to harms assessment |
| Acceptability                         | Highly acceptable                                                                                 | Low or variable acceptability                                                                       |
| Costs/resources                       | Cost savings/cost-effective                                                                       | Costly/cost-ineffective                                                                             |
| Feasibility                           | Feasible in intended settings                                                                     | Unfeasible or feasibility varies in intended settings                                               |
| Equity                                | Increases equity                                                                                  | Decreases equity or effects on equity variable                                                      |

**Table S5. Authors table for indexing in Pubmed**

| First name | Middle name | Family name     | Institute                                                                                                                |
|------------|-------------|-----------------|--------------------------------------------------------------------------------------------------------------------------|
| Gary       | L           | Darmstadt       | Prematurity Research Center, Department of Pediatrics, Stanford University School of Medicine, Stanford, California, USA |
| Nafisa     | Hamoud      | Al Jaifi        | Sana'a University, Sana'a, Yemen                                                                                         |
| Shabina    |             | Ariff           | Aga Khan University, Karachi, Pakistan                                                                                   |
| Rajiv      |             | Bahl            | World Health Organization, Geneva, Switzerland                                                                           |
| Mats       |             | Blennow         | Karolinska Institutet and University Hospital, Stockholm, Sweden                                                         |
| Vanessa    |             | Cavallera       | World Health Organization, Geneva, Switzerland                                                                           |
| Doris      |             | Chou            | World Health Organization, Geneva, Switzerland                                                                           |
| Roger      |             | Chou            | Oregon Health and Science University, Portland, Oregon, USA                                                              |
| Liz        |             | Comrie-Thomson  | Monash University, Melbourne, Australia                                                                                  |
| Karen      | M           | Edmond          | World Health Organization, Geneva, Switzerland                                                                           |
| Qi         |             | Feng            | Department of Pediatrics, Peking University First Hospital, Beijing, China                                               |
| Laurence   | M           | Grummer-Strawn  | World Health Organization, Geneva, Switzerland                                                                           |
| Patricia   |             | Fernandez Riera | Ministry of Health, Buenos Aires, Argentina                                                                              |
| Shuchita   |             | Gupta           | World Health Organization, Geneva, Switzerland                                                                           |
| Zelee      |             | Hill            | University College London, London, UK                                                                                    |
| Adejumoke  | Idowu       | Ayede           | University of Ibadan, Ibadan, Nigeria                                                                                    |
| Carole     |             | Kenner          | Council of International Neonatal Nurses, Yardley, USA                                                                   |
| Victoria   | Nakibuuka   | Kirabira        | Nsambya Hospital, Entebbe, Uganda                                                                                        |
| Reinhard   |             | Klinkott        | Klinikum Garmisch-Partenkirchen, Garmisch-Partenkirchen, Germany                                                         |
| Socorro    |             | De Leon Mendoza | Kangaroo Mother Care Foundation, Philippines, Inc, Manila, Philippines                                                   |
| Silke      |             | Mader           | European Foundation for the Care of Newborn Infants, Munich, Germany                                                     |
| Karim      |             | Manji           | Muhimbili University of Health and Allied Sciences, Dar Es Salaam, Tanzania                                              |
| Rhonda     |             | Marriot         | Murdoch University, Perth, Australia                                                                                     |
| Monica     |             | Morgues         | Universidad de Chile, Santiago, Chile                                                                                    |

|          |  |             |                                                                                      |
|----------|--|-------------|--------------------------------------------------------------------------------------|
| Sushma   |  | Nangia      | Lady Hardinge Medical College & Kalawati Saran Children's Hospital, New Delhi, India |
| Anayda   |  | Portela     | World Health Organization, Geneva, Switzerland                                       |
| Suman    |  | Rao         | St. John's Medical College, Bangalore, India                                         |
| Mohammad |  | Shahidullah | Bangabandhu Sheikh Mujib Medical University, Dhaka, Bangladesh                       |
| Hoang    |  | Thi Tran    | Da Nang Hospital for Women and Children, Da Nang, Viet Nam                           |
| Andrew   |  | Weeks       | University of Liverpool, Liverpool, UK                                               |
| Bogale   |  | Worku       | Ethiopian Pediatric Society, Addis Ababa, Ethiopia                                   |
| Khalid   |  | Yunis       | American University of Beirut, Beirut, Lebanon                                       |

**Figure S1. Scope of WHO recommendations for care of the preterm of low-birth-weight infant**

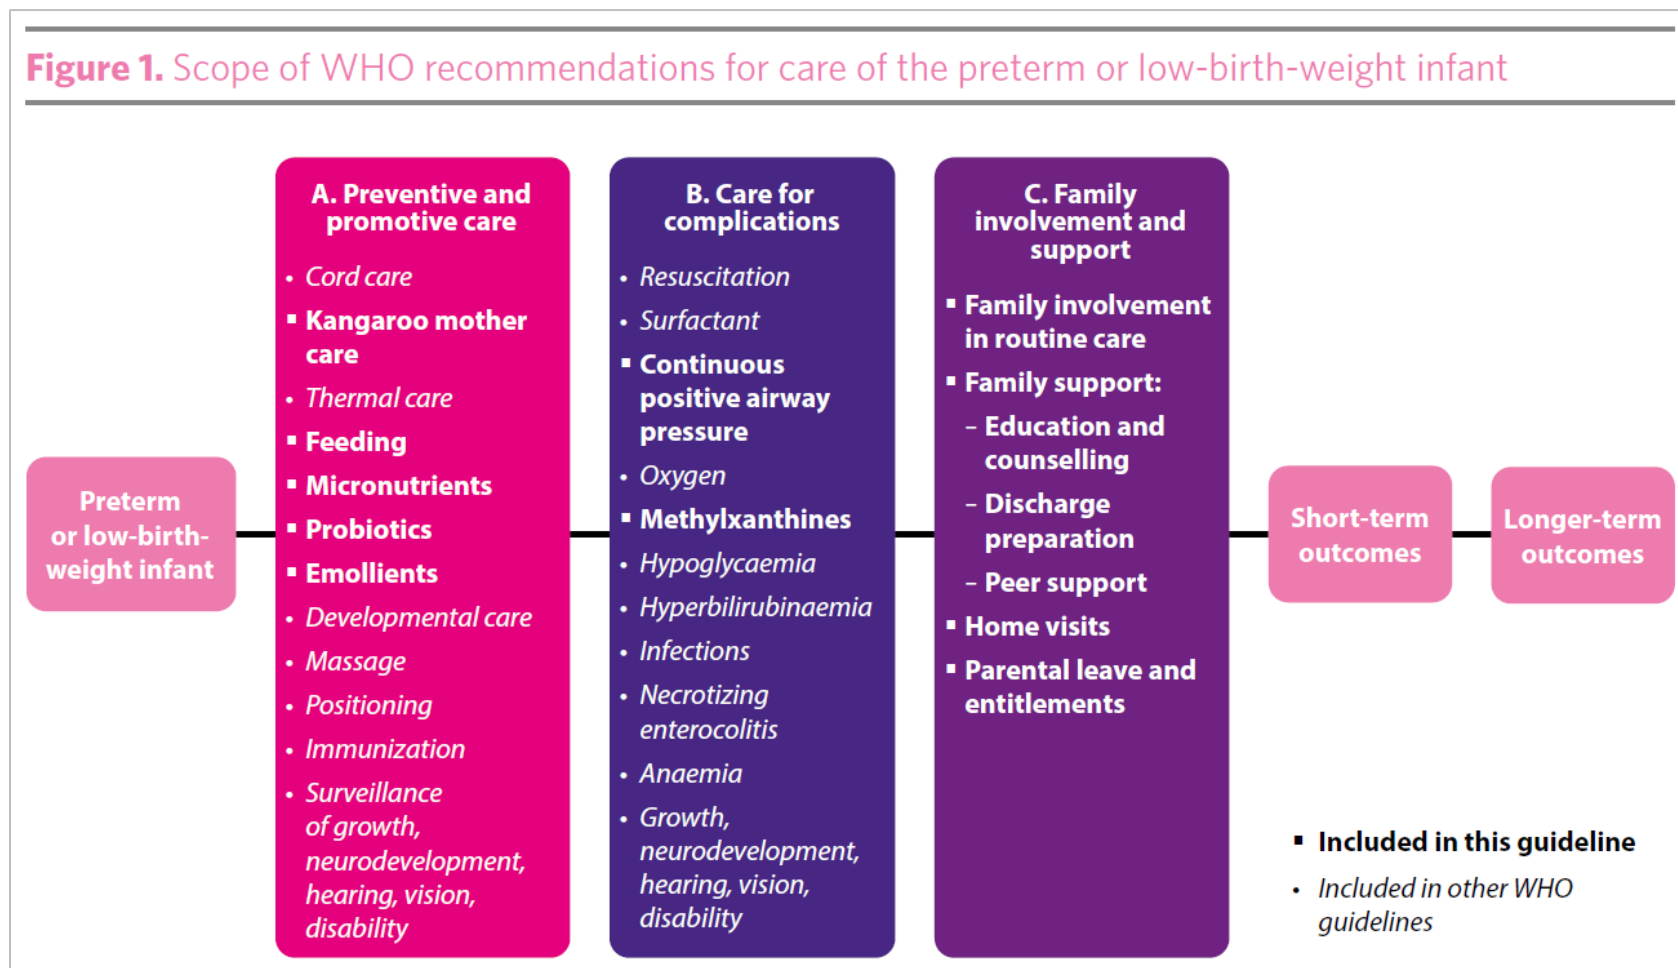

Reference: WHO recommendations for care of the preterm or low birth weight infant. Geneva: World Health Organization; 2022.

Licence: CC BY-NC-SA 3.0 IGO
